# Supplementary material for: Genome-wide identification of small heat-shock protein (HSP20) gene family in grape and expression profile during berry development
Source: PubMed Central journal article supplement (PMC6798335; doi:10.1186/s12870-019-2031-4), 2019-10-17

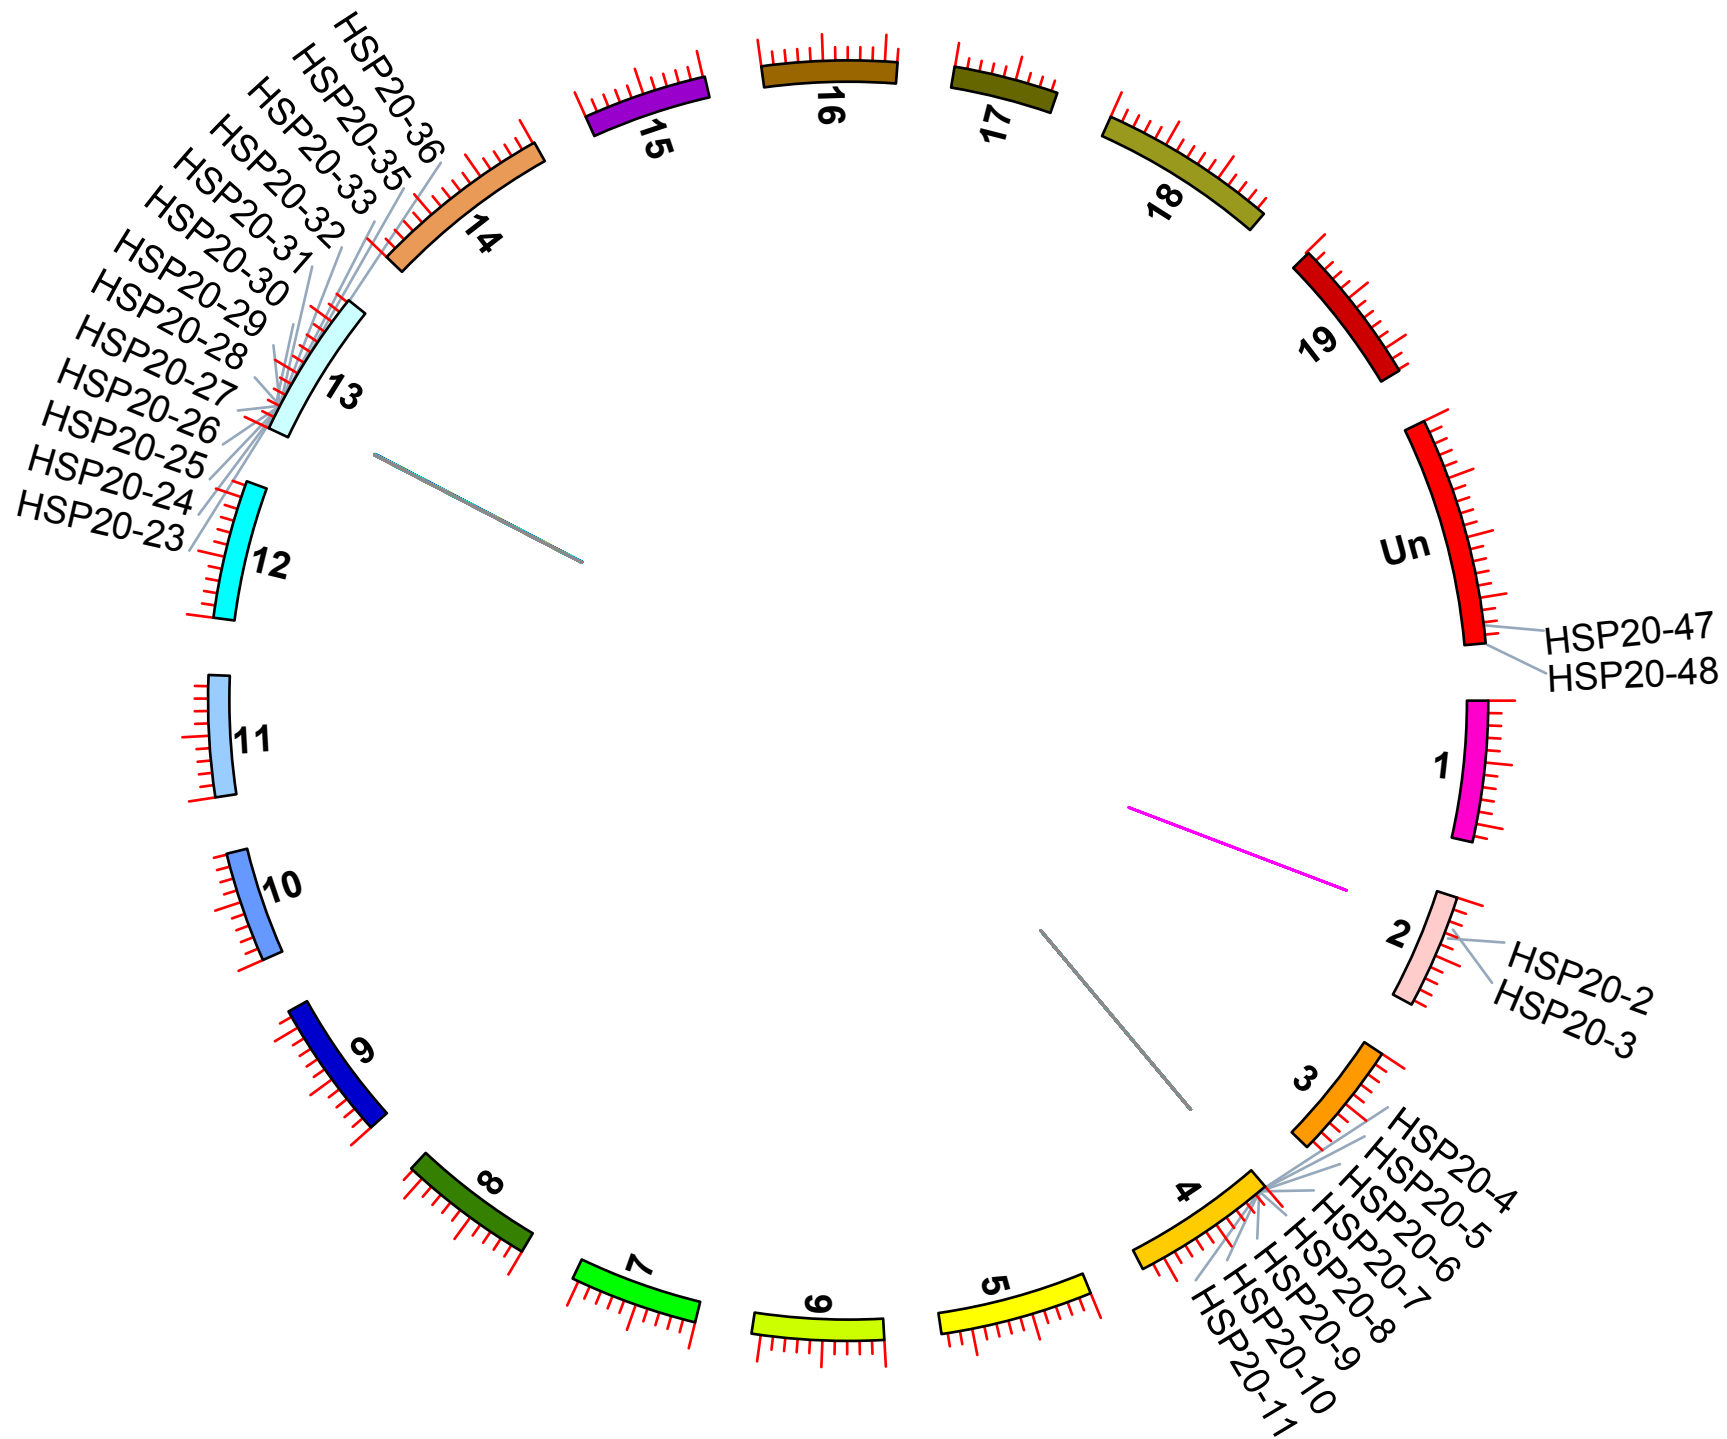

Supplement: 12870_2019_2031_MOESM1_ESM.pdf [file 12870_2019_2031_MOESM1_ESM.pdf]
